# Supplementary material for: CD8+ tissue-resident memory T cells promote liver fibrosis resolution by inducing apoptosis of hepatic stellate cells
Source: PubMed Central journal article supplement (PMC8298513; doi:10.1038/s41467-021-24734-0), 2021-07-22
Supplement: 41467_2021_24734_MOESM1_ESM.pdf [file 41467_2021_24734_MOESM1_ESM.pdf]

## Supplementary Information for

### **CD8<sup>+</sup> tissue-resident memory T cells promote liver fibrosis resolution by inducing apoptosis of hepatic stellate cells**

Yuzo Koda,<sup>1,2</sup> Toshiaki Teratani,<sup>1</sup> Po-Sung Chu,<sup>1</sup> Yuya Hagihara,<sup>1</sup> Yohei Mikami,<sup>1</sup> Yosuke Harada,<sup>1</sup> Hanako Tsujikawa,<sup>3</sup> Kentaro Miyamoto,<sup>1</sup> Takahiro Suzuki,<sup>1</sup> Nobuhito Taniki,<sup>1</sup> Tomohisa Sujino,<sup>1</sup> Michiie Sakamoto,<sup>3</sup> Takanori Kanai,<sup>1,4\*</sup> Nobuhiro Nakamoto<sup>1\*</sup>

<sup>1</sup>Division of Gastroenterology and Hepatology, Department of Internal Medicine, Keio University School of Medicine, Tokyo, Japan

<sup>2</sup>Mitsubishi Tanabe Pharma Corporation, Kanagawa, Japan

<sup>3</sup>Department of Pathology, Keio University School of Medicine, Tokyo, Japan

<sup>4</sup>Japan Agency for Medical Research and Development, AMED, Tokyo, Japan

\*Address correspondence to Nobuhiro Nakamoto ([nobuhiro@z2.keio.jp](mailto:nobuhiro@z2.keio.jp)) and Takanori Kanai ([takagast@z2.keio.jp](mailto:takagast@z2.keio.jp)), Division of Gastroenterology and Hepatology, Department of Internal Medicine, Keio University School of Medicine, Tokyo 1608582, Japan.

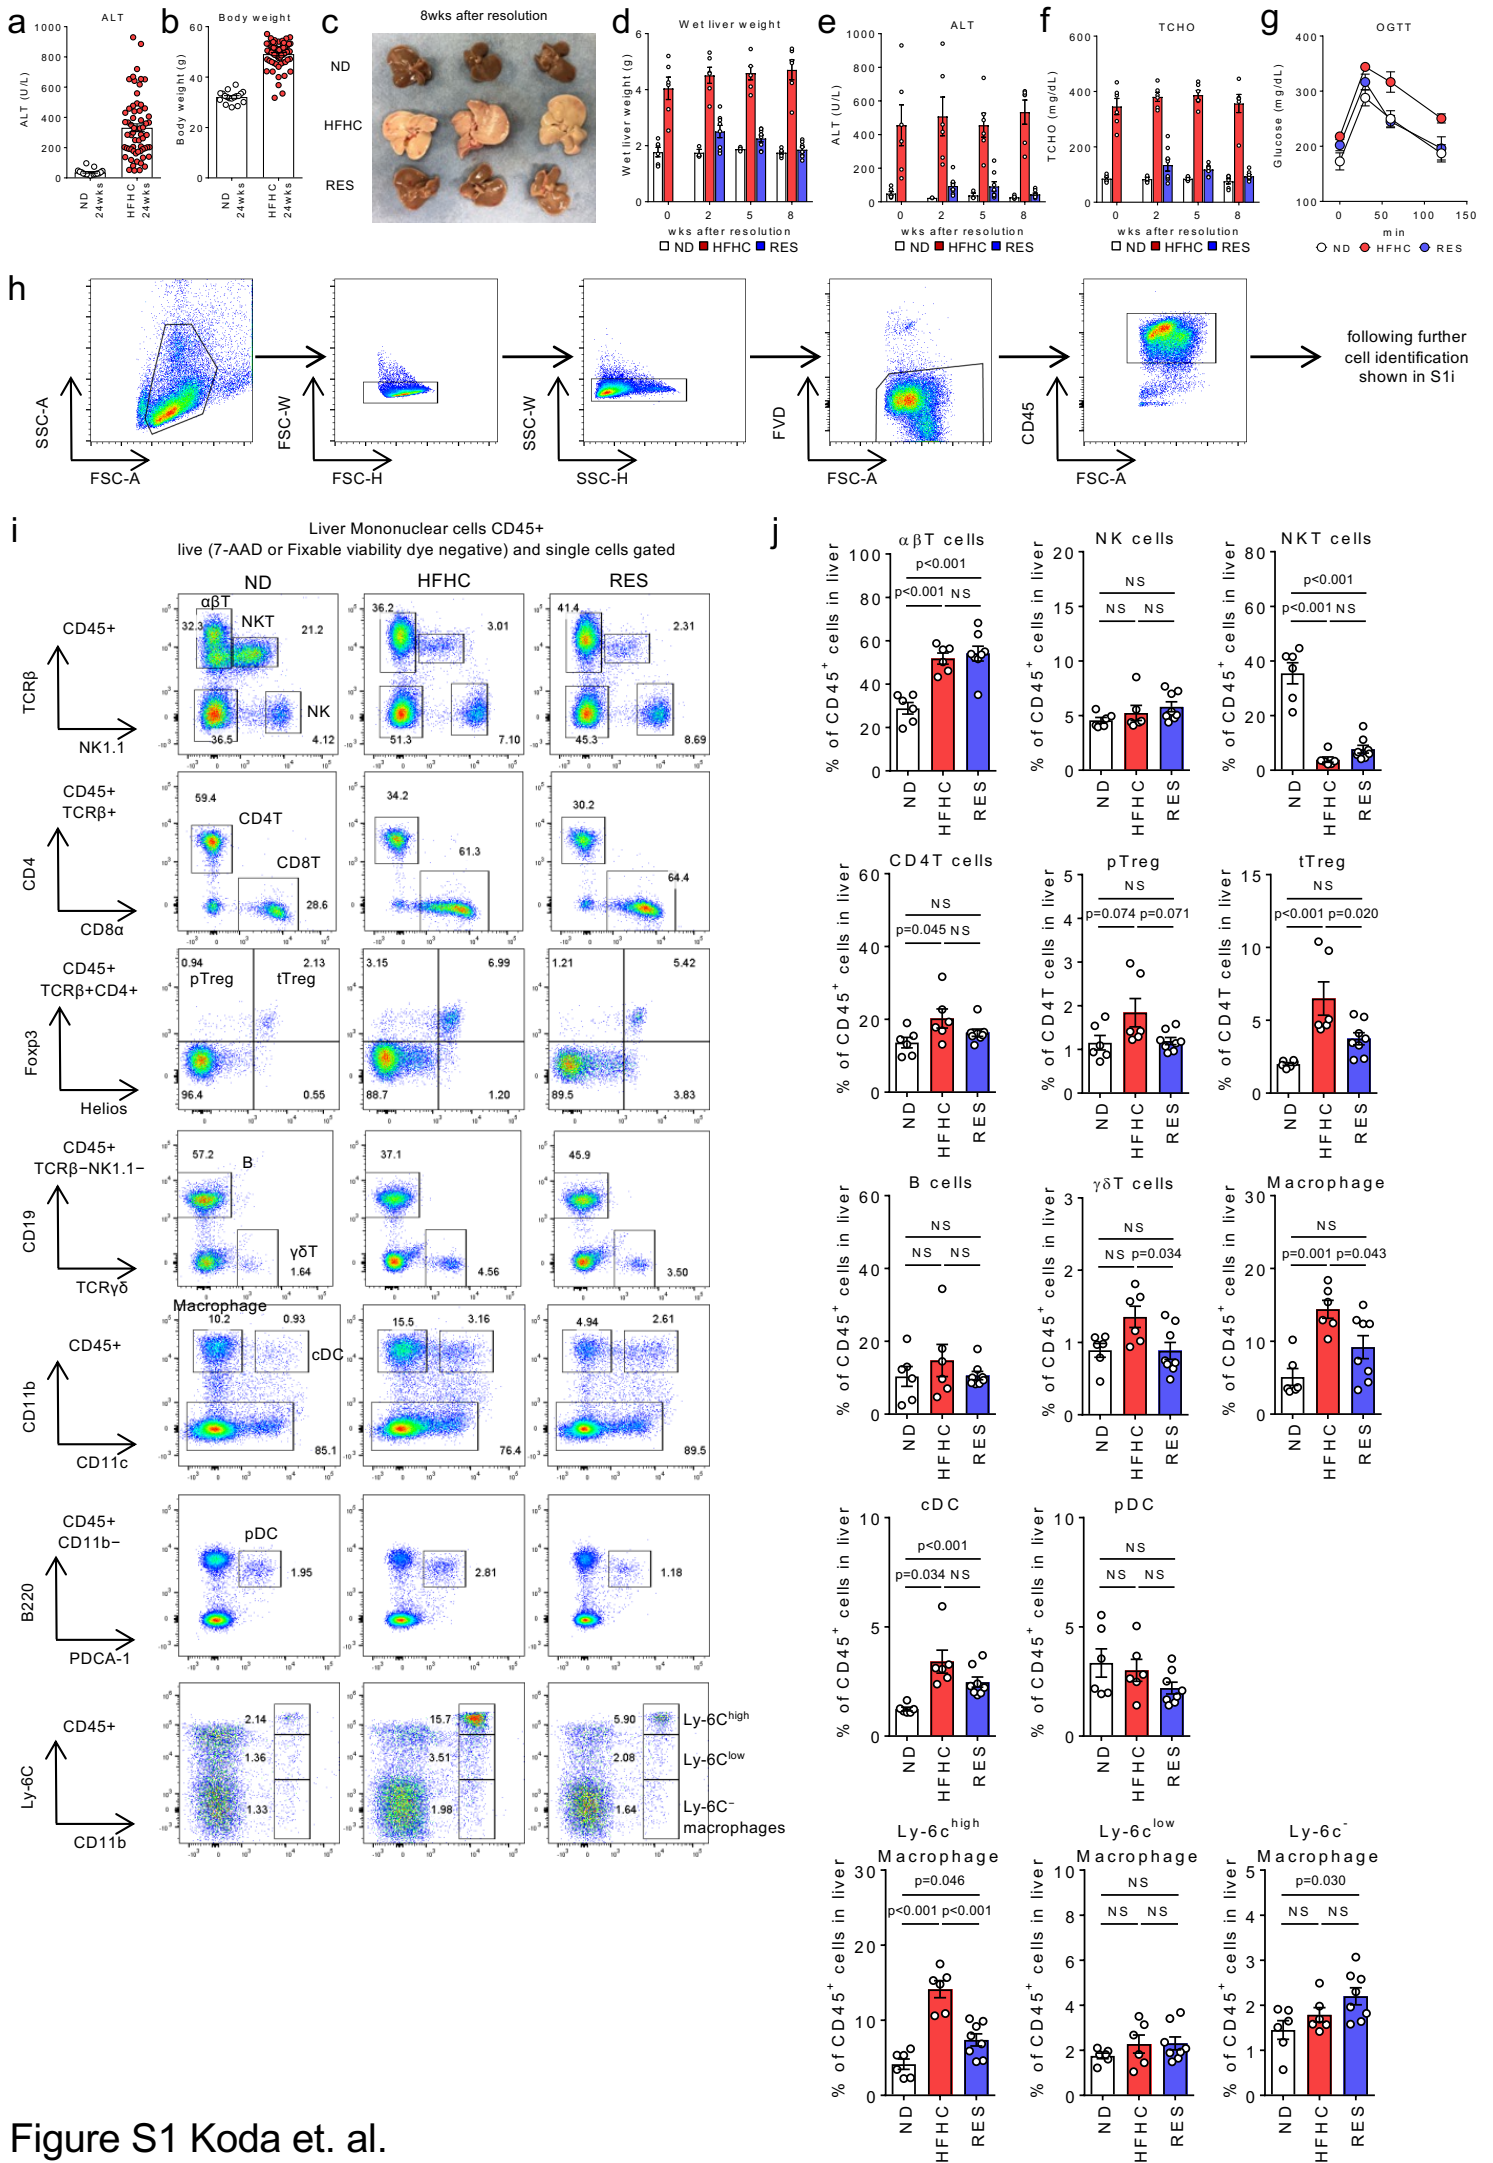

Figure S1 Koda et. al.

**Supplementary Figure 1. Compensated data of HFHC-induced NASH and liver fibrosis resolution models.** **a**, Serum ALT levels and **b**, body weight of HFHC-induced NASH mice (n=17 mice for ND 24 weeks group and n=63 mice for HFHC 24 weeks group). **c**, Representative gross photographs of livers. **d**, Wet liver weight, **e**, Serum ALT levels, **f**, Serum TCHO, and **g**, OGTT of ND, HFHC, and RES mice (**d-f**; n=3-6 mice for ND group, n=6 mice for HFHC group, and n=8 mice for RES group. **g**; n=4 mice for ND and RES groups, and n=3 mice for HFHC group). **h** and **i**, Gating strategy for FACS analysis. **j**, Frequency of the indicated immune cells in CD45<sup>+</sup> liver MNCs (n= 6 mice for ND and HFHC groups, and n=8 mice for RES group). Data are presented as mean  $\pm$  SEM. One-way ANOVA with Tukey's multiple comparisons post-hoc test was applied.

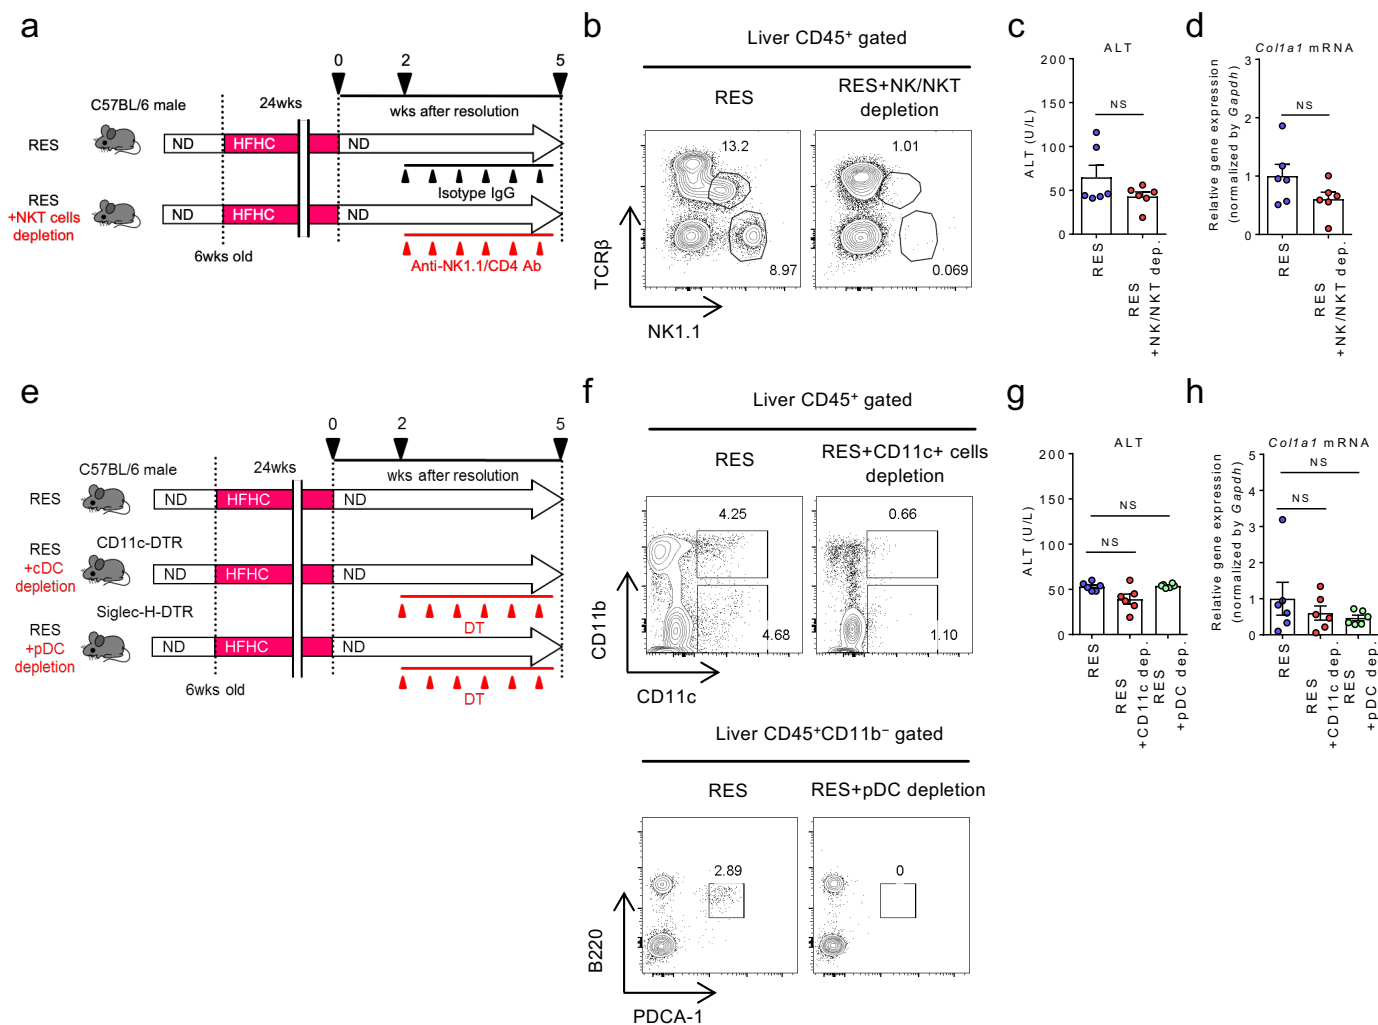

**Supplementary Figure 2. CD11c<sup>+</sup> myeloid cells, pDCs, NK cells, and NKT cells play no direct roles in NASH resolution.** **a**, Study design: resolution induced mice were intraperitoneally treated with isotype control (RES group) or anti-NK1.1 antibody and anti-CD4 antibody (RES+NK/NKT depletion group) once every three days for three weeks starting at week 2 following diet switch (n=6 mice per group). **b**, Representative TCR $\beta$ /NK1.1 staining of CD45<sup>+</sup> gated liver MNCs. **c**, Serum ALT levels. **d**, *Col1a1* mRNA levels. **e**, Study design: resolution induced mice (wild-type (WT), CD11c-DTR, or Siglec-H-DTR background) were either untreated or intraperitoneally treated with diphtheria toxin (DT) twice per week for three weeks starting at week 2 following diet switch (n = 6 mice per group). **f**, Representative TCR $\beta$ /NK1.1 staining of CD45<sup>+</sup> gated liver MNCs (upper) and B220/PDCA-1 staining of CD45<sup>+</sup>CD11b<sup>-</sup> gated liver MNCs (lower). **g**, Serum ALT levels. **h**, *Col1a1* mRNA levels. Data are presented as mean  $\pm$  SEM. Two-sided unpaired Student's *t*-test (**c** and **d**) or one-way ANOVA with Tukey's multiple comparisons post-hoc test (**g** and **h**) was applied.

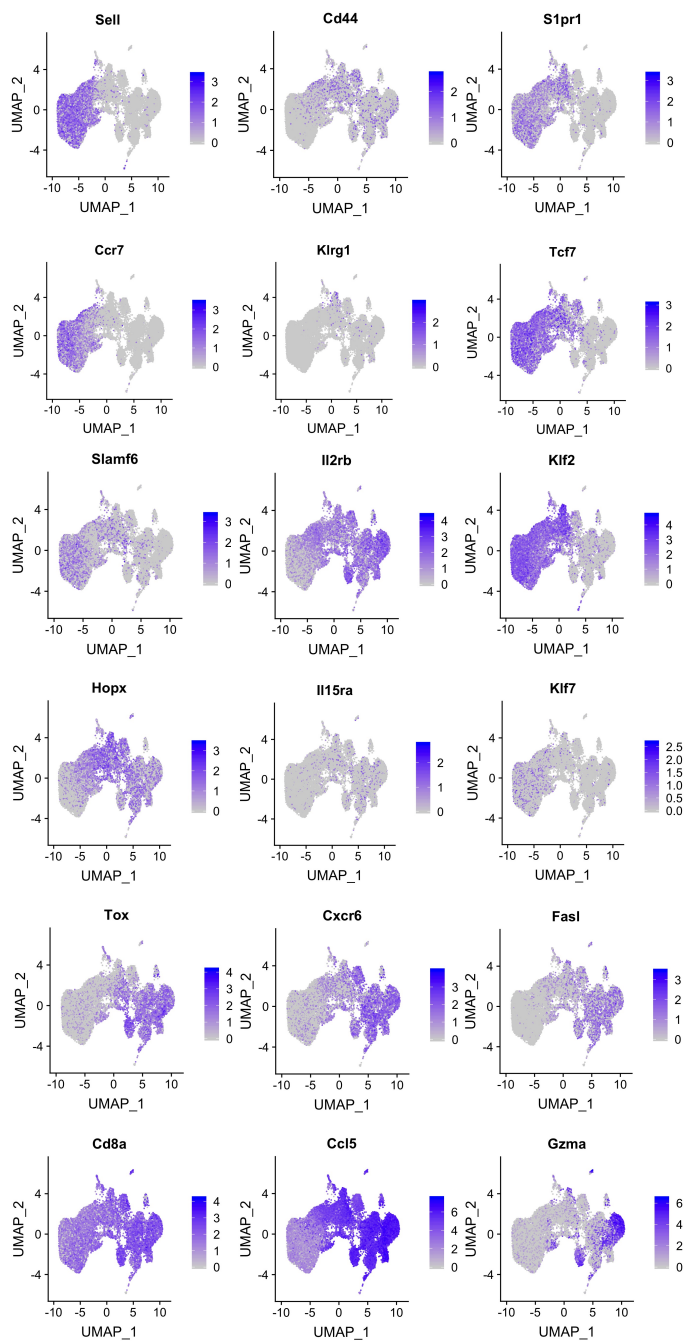

**Supplementary Figure 3. Compensated data for scRNA-seq analysis of liver CD8<sup>+</sup> T cells.** Expression levels of the specified marker genes on the UMAP plots of combined liver CD8<sup>+</sup> T cells.

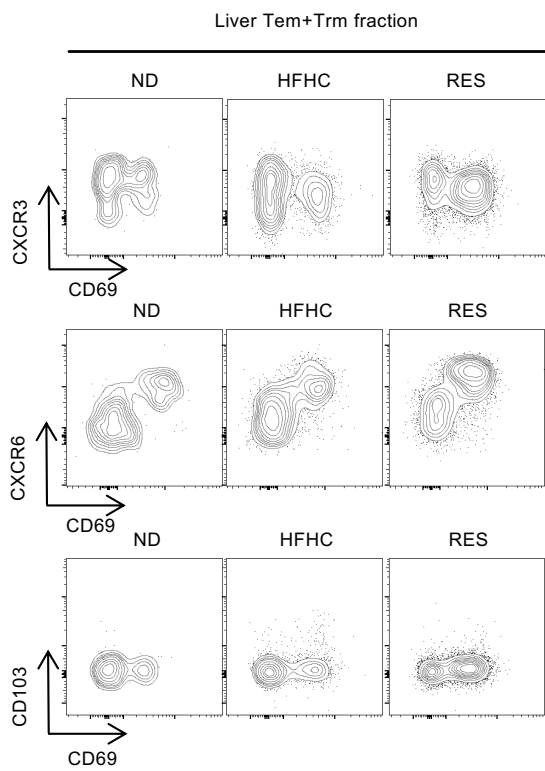

**Supplementary Figure 4. Compensated data for FACS analysis of liver CD8<sup>+</sup> T cells.** Representative CXCR3/CD69 (upper), CXCR6/CD69 staining (middle), and CD103/CD69 staining (lower) of CD45<sup>+</sup>TCR $\beta$ <sup>+</sup>NK1.1<sup>-</sup>CD8 $\alpha$ <sup>+</sup>CD44<sup>+</sup>CD62L<sup>-</sup> gated (Tem+Trm) liver MNCs derived from ND, HFHC, and RES (5 weeks) mice.



**Supplementary Figure 5. Compensated data for bulk RNA-seq analysis of liver CD8<sup>+</sup> T cells.** **a**, Heat map from Gene ontology (GO) enrich analysis between the indicated groups. GO terms enriched in top 2000 significantly different genes were shown (top 20, FDR<0.1). **(b and c)** Volcano plot of HFHC Tem vs RES Trm **(b)**, and of HFHC Trm vs RES Trm **(c)**. Red and green dots mean significantly higher and lower genes in RES Trm ( $P < 0.01$ , Fold change  $> \log_2 1.5$ ), respectively. **d**, Heat map showing the absolute transcript levels of genes related to chemotaxis (left) and inflammatory pathways (right). Source data are provided as a Source data file.



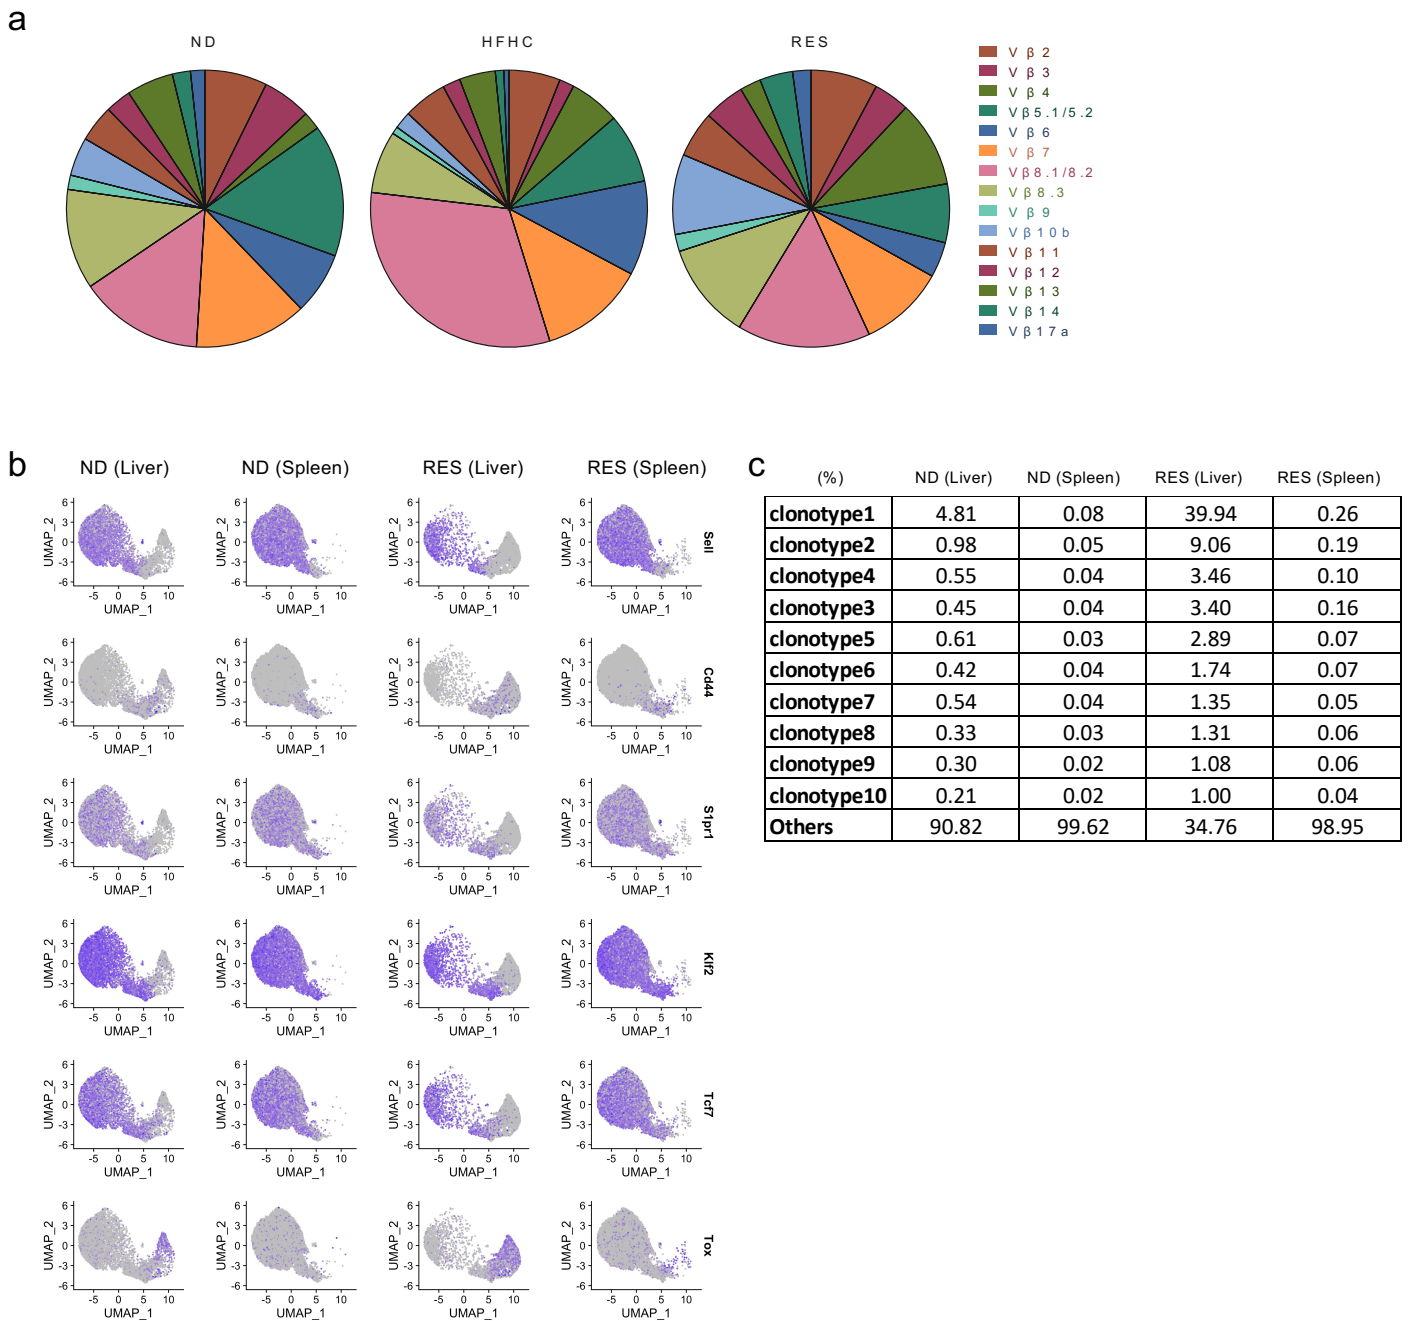

**Supplementary Figure 6. TCR repertoire analysis of liver CD8<sup>+</sup> Trm cells and compensated data for scTCR RNA-seq analysis of liver and spleen CD8<sup>+</sup> T cells.** **a**, Frequency of 15 different V $\beta$  families in CD8<sup>+</sup> Trm cells of ND, HFHC, and RES (5weeks) mice (n=6 mice for ND and HFHC groups; n=8 mice for RES group) using FACS analysis. **b**, Expression levels of the specified marker genes on the UMAP plots in each cell subset. **c**, Percent values of each of the top 10 and other TCR clonotypes. Source data are provided as a Source data file.

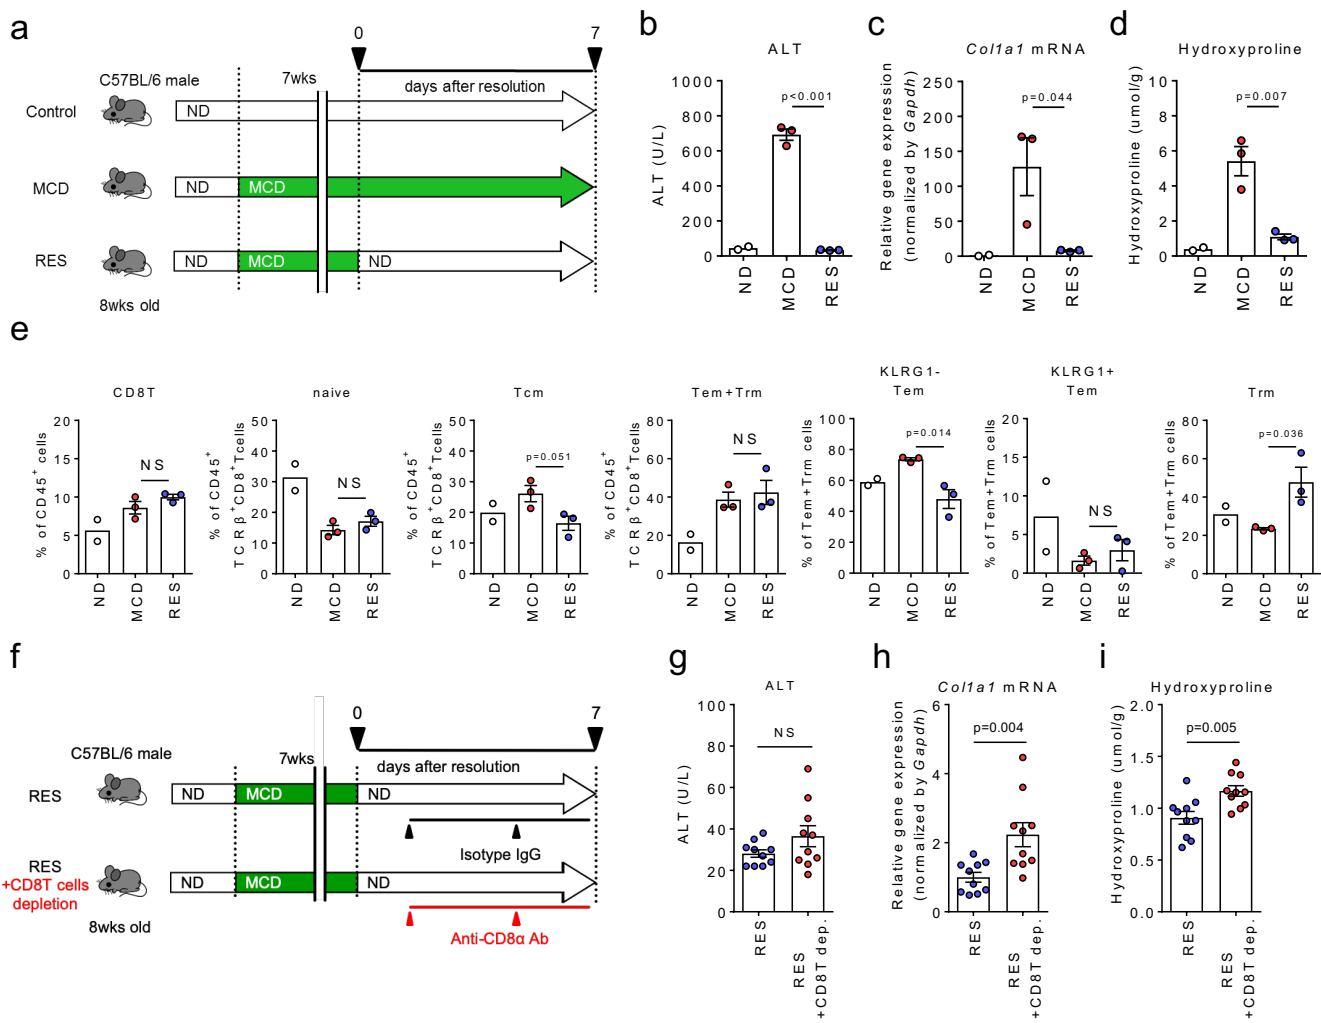

**Supplementary Figure 7. CD8<sup>+</sup> T cells play a direct role in MCD-induced liver fibrosis resolution.** **a**, Study design: Male C57BL/6 mice were fed a ND or MCD diet for seven weeks, after which ND-treated mice were continuously fed a ND (ND group) for one week. MCD diet-treated mice were fed MCD diet (MCD group) or switched to ND (resolution; RES group) for one week to induce resolution (n=2 mice for ND group, and n=3 mice for MCD and RES groups). **b**, Serum ALT levels. **c**, *Col1a1* mRNA levels. **d**, Hydroxyproline levels. **e**, Proportion of each CD8<sup>+</sup> T cell subset in CD45<sup>+</sup> liver MNCs of the indicated groups. **f**, Study design: resolution induced mice were intraperitoneally treated with isotype control (RES group) or anti-CD8 $\alpha$  antibody (RES+CD8T depletion group) on day 1 and day 4 after the diet switch (n=10 mice per group). **g**, Serum ALT levels. **h**, *Col1a1* mRNA levels. **i**, Hydroxyproline levels. Data represent mean  $\pm$  SEM. Two-sided unpaired Student's *t*-test was applied (MCD vs. RES for **b-e**, and RES vs. RES+CD8T dep. for **g-i**).

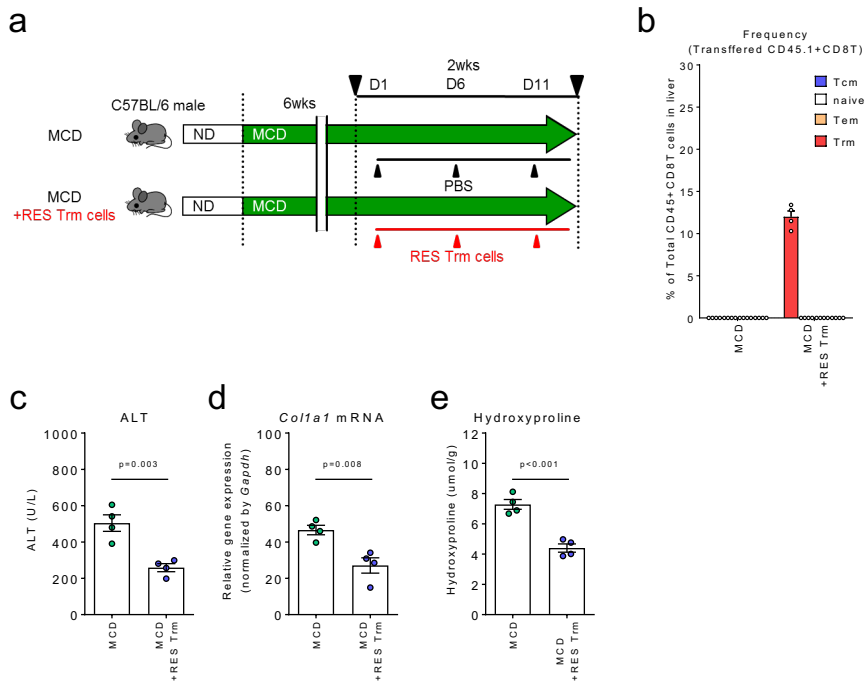

**Supplementary Figure 8. Transfer of sorted CD8<sup>+</sup> Trm cells ameliorates MCD-induced liver fibrosis.** **a**, Study design: male C57BL/6 (Ly5.2) mice were fed a MCD diet for eight weeks and were intravenously injected with either PBS or liver CD8<sup>+</sup> Trm (CD45<sup>+</sup>TCRβ<sup>+</sup>NK1.1<sup>-</sup>CD8α<sup>+</sup>CD44<sup>+</sup>CD62L<sup>-</sup>KLRG1<sup>-</sup>CD69<sup>+</sup>) cells isolated from Ly5.1RES (5 weeks) mice ( $2 \times 10^6$  cells each) on days 1, 6, and 11 starting at week six ( $n=4$  mice per group). **b**, Frequency of the transferred CD8<sup>+</sup> T cell subset in CD45<sup>+</sup> liver MNCs of the indicated mice groups. **c**, Serum ALT levels. **d**, *Col1a1* mRNA levels. **e**, Hydroxyproline levels. Data are presented as mean  $\pm$  SEM. Two-sided unpaired Student's *t*-test was applied.

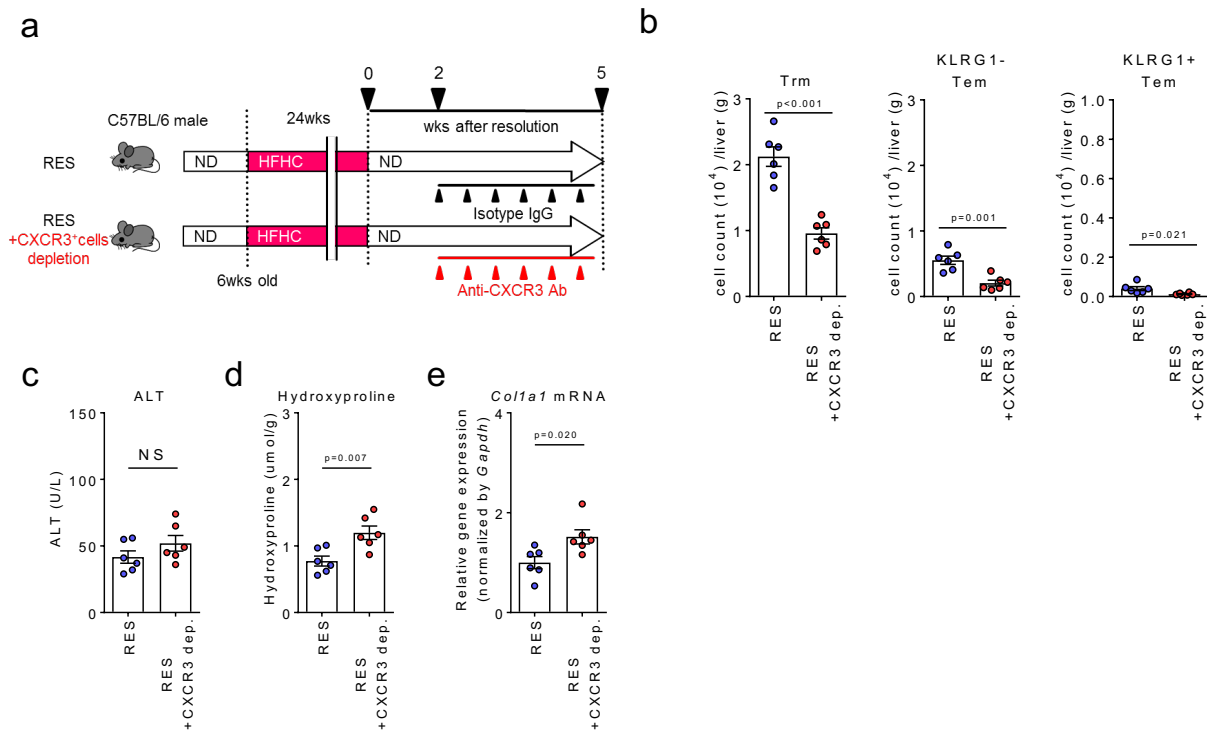

**Supplementary Figure 9. Depletion of CXCR3<sup>+</sup> cells prevents HFHC-induced liver fibrosis resolution.** **a**, Study design: RES mice were treated with either anti-CXCR3 antibody (RES+CXCR3<sup>+</sup> cells depletion group) or the isotype control (RES group) once every three days for three weeks starting at week 2 following diet switch (n=6 mice per group). **b**, Number of CD8<sup>+</sup> T<sub>rm</sub>, KLRG1<sup>-</sup> CD8<sup>+</sup> T<sub>em</sub>, and KLRG1<sup>+</sup>CD8<sup>+</sup> T<sub>em</sub> cells in CD45<sup>+</sup> liver MNCs. **c**, Serum ALT levels. **d** Hydroxyproline levels. **e**, *Col1a1* mRNA levels. Data are presented as mean  $\pm$  SEM. Two-sided unpaired Student's *t*-test was applied.

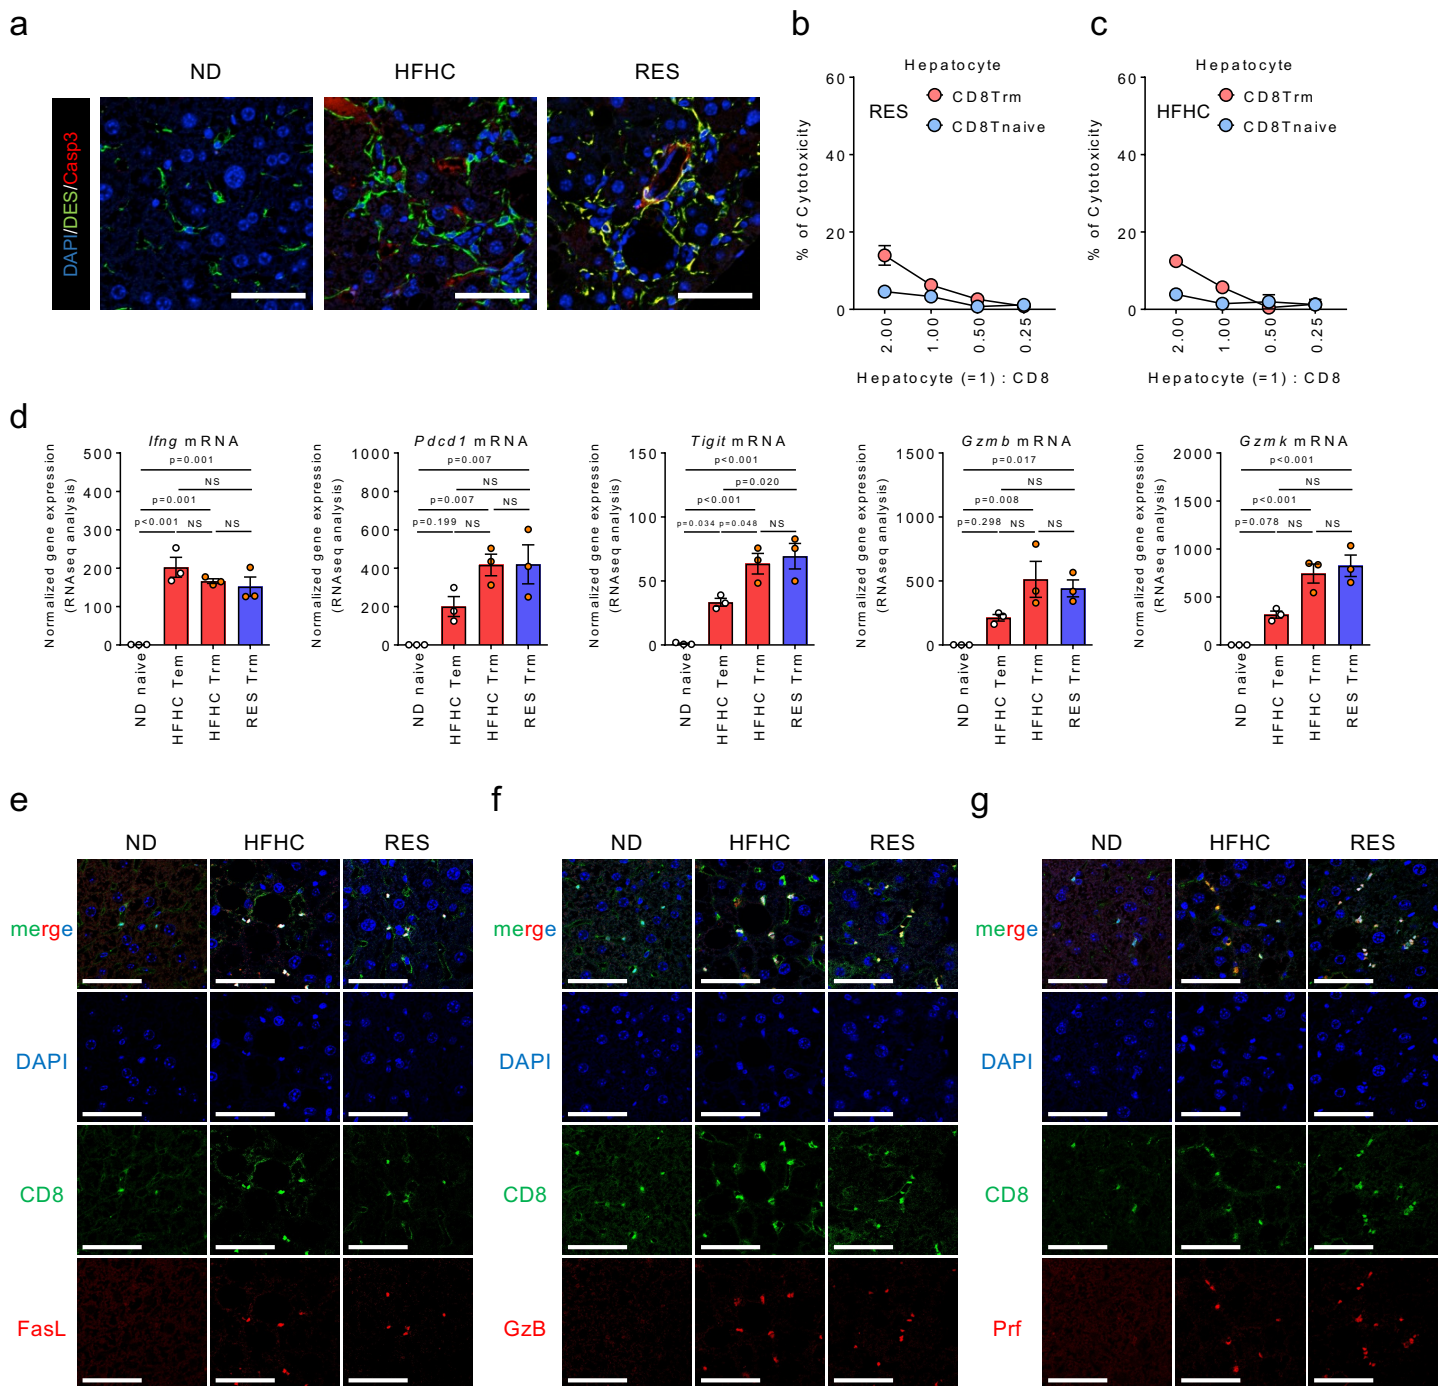

**Supplementary Figure 10. Cytotoxicity of HSCs by CD8<sup>+</sup> T cells.** **a**, Representative photomicrographs of liver sections stained with DAPI (blue), anti-desmin (green), and anti-cleaved caspase 3 Ab (red). Scale bars: 50  $\mu$ m. **b, c**, % cytotoxicity of hepatocytes by CD8 Trm (pink) or CD8 Tnaive (blue) isolated from RES 5weeks mice (**b**) or HFHC mice (**c**) (n=3 biologically independent samples per group). **d**, *Ifng*, *Pdccl1*, *Tigit*, *Gzmb*, and *Gzmk* mRNA levels in ND naive, HFHC Tem, HFHC Trm, and RES Trm cells (n=4 mice per group). Data are presented as mean  $\pm$  SEM. One-way ANOVA with Tukey's multiple comparisons post-hoc test was applied. **e**, Representative fluorescent photomicrographs of liver sections stained with DAPI (blue), anti-CD8 Ab (green), and anti-FasL (red). Scale bars: 50  $\mu$ m. **f**, Representative fluorescent photomicrographs of liver sections stained with DAPI (blue), anti-CD8 Ab (green), and anti-Granzyme B (Gzb) (red). Scale bars: 50  $\mu$ m. **g**, Representative fluorescent photomicrographs of liver sections stained with DAPI (blue), anti-CD8 Ab (green), and anti-Perforin (Prf) (red). Scale bars: 50  $\mu$ m. Photomicrograph data were representative from 4 independent samples and similar results were confirmed (**a, e-g**). Source data are provided as a Source data file.

Supplementary table 1. Clinical characteristics of participants

| <b>Background Characteristics</b>         | <b>All participants</b> | <b>Normal</b>       | <b>F1-2</b>         | <b>F3-4</b>         |
|-------------------------------------------|-------------------------|---------------------|---------------------|---------------------|
| <b>N</b>                                  | 18                      | 5                   | 4                   | 9                   |
| <b>Sex, F: M</b>                          | 6:12                    | 1:4                 | 0:4                 | 5:4                 |
| <b>Age, yrs</b>                           | 70.5<br>[22-87]         | 48<br>[22-72]       | 72.5<br>[66-87]     | 75<br>[58-86]       |
| <b>AST, IU/L</b>                          | 36.5<br>[16-63]         | 20<br>[16-25]       | 43<br>[36-63]       | 43<br>[26-62]       |
| <b>ALT, IU/L</b>                          | 26.5<br>[10-84]         | 18<br>[10-25]       | 45<br>[20-84]       | 28<br>[14-64]       |
| <b>γ-GTP, IU/L</b>                        | 51.5<br>[14-163]        | 29<br>[14-127]      | 56.5<br>[45-84]     | 51<br>[21-163]      |
| <b>Platelet count, x10<sup>4</sup>/μL</b> | 16.8<br>[6.3-22.6]      | 19.1<br>[18-22.6]   | 19.3<br>[16.6-22.4] | 11.7<br>[6.3-19]    |
| <b>Total bilirubin, mg/dL</b>             | 0.7<br>[0.4-2.4]        | 0.6<br>[0.4-1.3]    | 0.7<br>[0.6-1.0]    | 0.8<br>[0.4-2.4]    |
| <b>Serum albumin, g/dL</b>                | 4.1<br>[3.0-4.6]        | 4.4<br>[4.3-4.6]    | 4.2<br>[4.1-4.2]    | 3.8<br>[3.0-4.2]    |
| <b>APRI</b>                               | 0.62<br>[0.19-2.34]     | 0.25<br>[0.19-0.34] | 0.57<br>[0.53-0.70] | 0.83<br>[0.51-2.34] |
| <b>FIB-4 index</b>                        | 3.1<br>[0.54-11.0]      | 1.0<br>[0.54-1.94]  | 2.47<br>[2.04-4.12] | 4.45<br>[2.37-11.0] |

Data show median with ranges.

Supplementary table 2. List of antibodies used in this study

|                   | antibody                                             | Clonality  | clone number | conjugate       | Dilution | vendor                   | catalog number | Use                     |
|-------------------|------------------------------------------------------|------------|--------------|-----------------|----------|--------------------------|----------------|-------------------------|
|                   | anti- mouse CD8 antibody                             | monoclonal | 6A242        |                 | 1/50     | Santa Cruz Biotechnology | sc-70802       | IHC                     |
| Desmin            | anti- mouse desmin antibody                          | monoclonal |              |                 | 1/100    | Abcam                    | ab15200        | IHC                     |
| Desmin            | anti- mouse desmin antibody                          | monoclonal | DE-U-10      |                 | 1/100    | Abcam                    | ab6322         | IHC                     |
| cleaved caspase3  | anti- mousecleaved caspase Antibody                  | monoclonal | 269518       |                 | 1/100    | R&D                      | MAB835         | IHC                     |
| FasL              | anti- mouse FasL antibody                            | polyclonal |              |                 | 1/100    | sinobiological           | 101984         | IHC                     |
| Fas               | anti- mouse Fas antibody                             | polyclonal |              |                 | 1/100    | R&D                      | AF435          | IHC                     |
| Granzyme B        | anti- mouse Granzyme B antibody                      | polyclonal |              |                 | 1/100    | R&D                      | AF1865         | IHC                     |
| Perforin 1        | anti- mouse Perforin antibody                        | monoclonal | CB5.4        |                 | 1/100    | Abcam                    | ab16074        | IHC                     |
| CD8               | anti- human CD8 antibody                             | monoclonal | C8/144B      |                 | 1/100    | Nichirei                 | 413211         | IHC                     |
| CD69              | anti- human CD69 antibody                            | monoclonal | EPR21814     |                 | 1/100    | Abcam                    | ab233396       | IHC                     |
|                   | anti- rabbit IgG antibody (Secondary antibody)       | polyclonal |              | Alexa Fluor 488 |          | Abcam                    | ab150077       | IHC                     |
|                   | anti- mouse IgG antibody (Secondary antibody)        | polyclonal |              | Alexa Fluor 555 |          | Abcam                    | ab150062       | IHC                     |
|                   | anti- guinea pig IgG antibody (Secondary antibody)   | polyclonal |              | Alexa Fluor 647 |          | Abcam                    | ab150187       | IHC                     |
| CD8α              | anti- CD8α antibody                                  | monoclonal | 2.43         |                 |          | BioXcell                 | BE0061         | in vivo depletion       |
| NK1.1             | anti- NK1.1 antibody                                 | monoclonal | PK136        |                 |          | BioXcell                 | BE0036         | in vivo depletion       |
| CD4               | anti- CD4 antibody                                   | monoclonal | GK1.5        |                 |          | BioXcell                 | BP0003-1       | in vivo depletion       |
| IL-15             | anti- IL-15 antibody                                 | monoclonal | AIO.3        |                 |          | BioXcell                 | BE0315         | in vivo neutralization  |
| FasL              | anti- FasL antibody                                  | monoclonal | MFL3         |                 |          | BioXcell                 | BE0319         | in vivo neutralization  |
| CXCR3             | anti- CXCR3 antibody                                 | monoclonal | CXCR3-173    |                 |          | BioXcell                 | BE0249         | in vivo depletion       |
| FasL              | anti1-FasL antibody                                  | monoclonal | MFL4         |                 |          | BioLegend                | 106707         | in vitro neutralization |
| IFN-γ             | anti- IFN-γ antibody                                 | monoclonal | XMG1.2       |                 |          | BD Biosciences           | 559065         | in vitro neutralization |
| PD-1              | anti- PD-1 antibody                                  | monoclonal | 29F.1A12     |                 |          | BioLegend                | 135246         | in vitro neutralization |
| TIGIT             | anti- TIGIT antibody                                 | monoclonal | A17200C      |                 |          | BioLegend                | 622203         | in vitro neutralization |
| CD45.2            | anti- CD45.2 antibody                                | monoclonal | 104          | FITC            | 1/200    | BD Biosciences           | 553772         | FACS                    |
| CD45.2            | anti- CD45.2 antibody                                | monoclonal | 104          | BV510           | 1/200    | BD Biosciences           | 109838         | FACS                    |
| CD45.1            | anti- CD45.1 antibody                                | monoclonal | A20          | FITC            | 1/200    | BD Biosciences           | 553775         | FACS                    |
| CD45.1            | anti- CD45.1 antibody                                | monoclonal | A20          | PE-Cy7          | 1/200    | BioLegend                | 110729         | FACS                    |
| CD45              | anti- CD45 antibody                                  | monoclonal | 30-F11       | BV510           | 1/200    | BioLegend                | 103138         | FACS                    |
| TCRβ              | anti- TCR β chain antibody                           | monoclonal | H57-597      | PerCP-Cy5.5     | 1/200    | BD Biosciences           | 109228         | FACS                    |
| TCRβ              | anti- TCR β chain antibody                           | monoclonal | H57-597      | APC             | 1/200    | BD Biosciences           | 553174         | FACS                    |
| TCRβ              | anti- TCR β chain antibody                           | monoclonal | H57-597      | APC-Cy7         | 1/200    | BioLegend                | 109220         | FACS                    |
| B220              | anti- B220 antibody                                  | monoclonal | RA3-6B2      | PerCP-Cy5.5     | 1/200    | BioLegend                | 103236         | FACS                    |
| NK1.1             | anti- NK-1.1 antibody                                | monoclonal | PK136        | PE-Cy7          | 1/200    | BioLegend                | 108714         | FACS                    |
| CD4               | anti- CD4 antibody                                   | monoclonal | RM4-5        | FITC            | 1/200    | BD Biosciences           | 553047         | FACS                    |
| CD4               | anti- CD4 antibody                                   | monoclonal | RM4-5        | BV510           | 1/200    | BD Biosciences           | 563106         | FACS                    |
| CD8α              | anti- CD8α antibody                                  | monoclonal | 53-6.7       | FITC            | 1/200    | BD Biosciences           | 553031         | FACS                    |
| CD8α              | anti- CD8α antibody                                  | monoclonal | 53-6.7       | PerCP-Cy5.5     | 1/200    | BD Biosciences           | 100734         | FACS                    |
| CD8α              | anti- CD8α antibody                                  | monoclonal | 53-6.7       | APC             | 1/200    | BD Biosciences           | 553035         | FACS                    |
| CD8α              | anti- CD8α antibody                                  | monoclonal | 53-6.7       | APC-Cy7         | 1/200    | BD Biosciences           | 557654         | FACS                    |
| CD69              | anti- CD69 antibody                                  | monoclonal | H1.2F3       | FITC            | 1/200    | Thermo Fisher Scientific | 11-0691-85     | FACS                    |
| CD103             | anti- CD103 antibody                                 | monoclonal | 2E7          | BV421           | 1/200    | BioLegend                | 121421         | FACS                    |
| CXCR3             | anti- CXCR3 antibody                                 | monoclonal | CXCR3-173    | APC             | 1/200    | Thermo Fisher Scientific | 17-1831-82     | FACS                    |
| CXCR6             | anti- CXCR6 antibody                                 | monoclonal | SA051D1      | APC             | 1/200    | BioLegend                | 151105         | FACS                    |
| CD62L             | anti- CD62L antibody                                 | monoclonal | MEL-14       | PE              | 1/200    | BD Biosciences           | 553151         | FACS                    |
| KLRG1             | anti- KLRG1 antibody                                 | monoclonal | 2F1/KLRG1    | PerCP-Cy5.5     | 1/200    | BioLegend                | 138417         | FACS                    |
| CD44              | anti- CD44 antibody                                  | monoclonal | IM7          | BV421           | 1/200    | BioLegend                | 103039         | FACS                    |
| CD11c             | anti- CD11c antibody                                 | monoclonal | HL3          | FITC            | 1/200    | BD Biosciences           | 557400         | FACS                    |
| CD11c             | anti- CD11c antibody                                 | monoclonal | HL3          | PE-Cy7          | 1/200    | BD Biosciences           | 558079         | FACS                    |
| Foxp3             | anti- FOXP3 antibody                                 | monoclonal | FJK-16s      | PE              | 1/200    | Thermo Fisher Scientific | 12-5773-82     | FACS                    |
| Foxp3             | anti- FOXP3 antibody                                 | monoclonal | FJK-16s      | PerCP-Cy5.5     | 1/200    | Thermo Fisher Scientific | 45-5773-82     | FACS                    |
| Helios            | anti- Helios antibody                                | monoclonal | 22F-6        | APC             | 1/200    | BioLegend                | 137222         | FACS                    |
| TCRγδ             | anti- TCR γδ chain antibody                          | monoclonal | GL3          | PerCP-Cy5.5     | 1/200    | BioLegend                | 118118         | FACS                    |
| CD19              | anti- CD19 antibody                                  | monoclonal | 1D3          | PE              | 1/200    | BD Biosciences           | 553786         | FACS                    |
| CD11b             | anti- CD11b antibody                                 | monoclonal | M1/70        | PE-Cy7          | 1/200    | BD Biosciences           | 552850         | FACS                    |
| CD11b             | anti- CD11b antibody                                 | monoclonal | M1/70        | APC-Cy7         | 1/200    | BD Biosciences           | 557657         | FACS                    |
| PDCA-1            | anti- PDCA-1 antibody                                | monoclonal | 129c1        | APC             | 1/200    | BioLegend                | 127106         | FACS                    |
| CCR5              | anti- CCR5 antibody                                  | monoclonal | 7A4          | PE              | 1/100    | Thermo Fisher Scientific | 12-1951-82     | FACS                    |
| Mouse BD Fc Block | anti- CD16/CD32 antibody                             | monoclonal | 2.4G2        |                 | 1/100    | BD Biosciences           | 553141         | FACS                    |
|                   | Intracellular Fixation & Permeabilization Buffer Set |            |              |                 |          | Thermo Fisher Scientific | 88-8824-00     | FACS                    |
|                   | Fixable Viability Dye eFluor 780                     |            |              |                 | 1/1000   | Thermo Fisher Scientific | 65-0865-14     | FACS                    |
|                   | 7-AAD Viability Staining Solution                    |            |              |                 | 1/100    | BD Biosciences           | 51-68981E      | FACS                    |

Supplementary table 3. List of Taqman probes used in this study

| Genes         | catalog number | conjugate | vendor                   |
|---------------|----------------|-----------|--------------------------|
| <i>Col1a1</i> | Mm00801666_g1  | FAM       | Thermo Fisher Scientific |
| <i>Col1a2</i> | Mm00483888_m1  | FAM       | Thermo Fisher Scientific |
| <i>Acta2</i>  | Mm00725412_s1  | FAM       | Thermo Fisher Scientific |
| <i>Timp1</i>  | Mm01341361_m1  | FAM       | Thermo Fisher Scientific |
| <i>Desmin</i> | Mm00802455_m1  | FAM       | Thermo Fisher Scientific |
| <i>Spp1</i>   | Mm00436767_m1  | FAM       | Thermo Fisher Scientific |
| <i>Il15</i>   | Mm00434210_m1  | FAM       | Thermo Fisher Scientific |
| <i>Ccl3</i>   | Mm00441258_m1  | FAM       | Thermo Fisher Scientific |
| <i>Ccl4</i>   | Mm00443111_m1  | FAM       | Thermo Fisher Scientific |
| <i>Ccl5</i>   | Mm01302427_m1  | FAM       | Thermo Fisher Scientific |
| <i>Ccr5</i>   | Mm001216171_m1 | FAM       | Thermo Fisher Scientific |
| <i>Fas</i>    | Mm00433237_m1  | FAM       | Thermo Fisher Scientific |
| <i>Gapdh</i>  | Mm9999915_g1   | VIC       | Thermo Fisher Scientific |
